# Supplementary material for: Post-synthetic pore-space expansion in a di-tagged metal–organic framework
Source: Royal Society of Chemistry journal article supplement (doi:10.1039/c4ce01377h), 2014-08-13
Supplement: c4ce01377h1.pdf [file c4ce01377h1.pdf]

## Supplementary Information

### Post-synthetic pore-space expansion in a di-tagged Metal-Organic Framework

Lodey Tshering,<sup>a</sup> Sally O. Hunter,<sup>a</sup> Alexandra Nikolich,<sup>a</sup> Erica Minato,<sup>a</sup> Christopher M. Fitchett,<sup>b</sup>  
Deanna M. D'Allesandro<sup>c</sup> and Christopher Richardson\*<sup>a</sup>

<sup>a</sup> School of Chemistry, University of Wollongong, Wollongong NSW 2522, Australia

<sup>b</sup> Department of Chemistry, University of Canterbury, Christchurch, New Zealand

<sup>c</sup> School of Chemistry, University of Sydney, Sydney, Australia

#### Table of Contents

|    |                                                                                      |    |
|----|--------------------------------------------------------------------------------------|----|
| 1  | Synthesis of 2,5-bis(allyloxy)terephthalic acid, H <sub>2</sub> L <sup>1</sup> ..... | 2  |
| 2  | Single Crystal X-ray Crystallography .....                                           | 5  |
| 3  | TG–DTA data .....                                                                    | 8  |
| 4  | Images of modified crystals .....                                                    | 9  |
| 5  | <sup>1</sup> H NMR Digestion Spectra .....                                           | 10 |
| 6  | Infrared Spectroscopy .....                                                          | 12 |
| 7  | Mass Spectrometry .....                                                              | 13 |
| 8  | PXRD.....                                                                            | 14 |
| 9  | Gas Sorption Data.....                                                               | 15 |
| 10 | Heat of Adsorption Calculations.....                                                 | 17 |
| 11 | Surface Area Calculations.....                                                       | 18 |

## 1 Synthesis of 2,5-bis(allyloxy)terephthalic acid, H<sub>2</sub>L<sup>1</sup>

The synthesis of this ligand has been reported in the literature.<sup>1</sup> The procedure below is what we used.

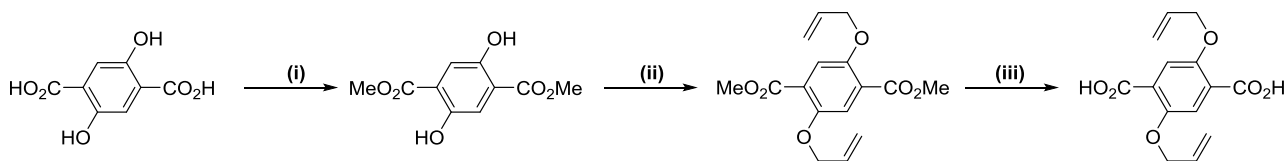

Scheme S1. (i) H<sub>2</sub>SO<sub>4</sub>, MeOH (ii) Allyl bromide, K<sub>2</sub>CO<sub>3</sub>, DMF (iii) NaOH<sub>(aq)</sub>, MeOH/THF.

### Dimethyl 2,5-dihydroxyterephthalate

Concentrated H<sub>2</sub>SO<sub>4</sub> (1 cm<sup>3</sup>) was added dropwise to 2,5-dihydroxyterephthalic acid (5.15 g, 26 mmol) in MeOH (40 cm<sup>3</sup>) while stirring and then the mixture was heated at reflux for 2 days. After allowing to cool, a yellow solid was filtered and washed with fresh MeOH (3 × 5 cm<sup>3</sup>). Yield 4.82 g (82 %). <sup>1</sup>H NMR δ<sub>H</sub> (300 MHz, CDCl<sub>3</sub>): 3.96 (6 H, s), 7.46 (2 H, s), 10.05 (2 H, s).

### Dimethyl 2,5-bis(allyloxy)terephthalate

Allyl bromide (4.5 cm<sup>3</sup>, 27 mmol) was added to dimethyl 2,5-bis(allyloxy)terephthalate (1.71 g, 7.5 mmol) in a mixture of DMF (12 cm<sup>3</sup>), powdered K<sub>2</sub>CO<sub>3</sub> (3.6 g, 26 mmol) and Me<sub>4</sub>NI (0.1 g, 0.5 mmol) and the mixture stirred at room temperature over the weekend. The mixture was then diluted with H<sub>2</sub>O (40-50 cm<sup>3</sup>) and the precipitated solid collected by filtration and washed with water (2 × 10 cm<sup>3</sup>). The solid was taken up in EtOAc and the solution washed with 10% Na<sub>2</sub>CO<sub>3</sub> solution until the organic layer was colourless, then with H<sub>2</sub>O, brine and dried over Na<sub>2</sub>SO<sub>4</sub> and the solvent was removed by rotary evaporation. The resulting solid was taken up in CH<sub>2</sub>Cl<sub>2</sub> and passed through a plug of silica gel then concentrated by rotary evaporation before crystallization from CH<sub>2</sub>Cl<sub>2</sub>/Pet. Ether. Yield 1.53 g (54 %). Found: C, 62.94; H, 5.92. C<sub>16</sub>H<sub>18</sub>O<sub>6</sub> requires C, 62.74; H, 5.92. <sup>1</sup>H NMR δ<sub>H</sub> (300 MHz; CDCl<sub>3</sub>) 3.94 (6 H, s), 4.60 (4 H, dt, *J* = 4.98, 1.46 Hz), 5.29 (2 H, m, *J* = 10.52, 1.47 Hz), 5.48 (2 H, m, *J* = 17.28, 1.76 Hz), 6.01 (2 H, m), 7.40 (2 H, s).

### 2,5-Bis(allyloxy)terephthalic acid, H<sub>2</sub>L<sup>1</sup>

1 M NaOH (15 cm<sup>3</sup>, 15 cm<sup>3</sup>) was added to dimethyl 2,5-bis(allyloxy)terephthalate (1.75 g, 5.7 mmol) in a solvent mixture of MeOH-THF (1-1, 30 cm<sup>3</sup>) and the mixture stirred overnight. The organic solvents were removed by rotary evaporation and the residue diluted with H<sub>2</sub>O (20 cm<sup>3</sup>) and filtered before acidification with 1 M HCl to precipitate a white solid and this was collected by filtration, washed with H<sub>2</sub>O (3 × 5 cm<sup>3</sup>) and oven dried (80 °C). Yield 1.44 g (91%). Found: C, 60.66; H, 5.04. C<sub>14</sub>H<sub>14</sub>O<sub>6</sub> requires C, 60.43; H, 5.07. <sup>1</sup>H NMR δ<sub>H</sub> (300 MHz; DMSO-*d*<sub>6</sub>) 4.59 (4 H, dt, *J* = 4.42, 1.71 Hz), 5.23 (2 H, m, *J* = 10.63, 1.74 Hz), 5.43 (2 H, m, *J* = 17.29, 1.62 Hz), 6.01 (2 H, m, *J* = 17.29, 10.63, 4.74 Hz), 7.30 (2 H, s); <sup>13</sup>C NMR δ<sub>C</sub> (300 MHz; DMSO-*d*<sub>6</sub>) 69.56, 116.01, 117.14, 125.52, 133.62, 150.24, 166.92.

cr110208\_CR-diallyl-acid\_Proton  
Archive directory: /export/home/chemist/vnmrsys/data  
File: cr110208\_CR-diallyl-acid\_Proton  
Pulse Sequence: s2pu1  
Solvent: DMSO  
Temp: 25.0 C / 298.1 K  
Operator: chemist  
File: cr110208\_CR-diallyl-acid\_Proton  
VNMRS-500 "zeeman.domain.com"  
Relax. delay 1.000 sec  
Pulse 45.0 degrees  
Acq. time 1.998 sec  
Width 4798.5 Hz  
16 repetitions  
OBSERVE H1, 299.9586642 MHz  
DATA PROCESSING  
FT size 32768  
Total time 0 min, 48 sec

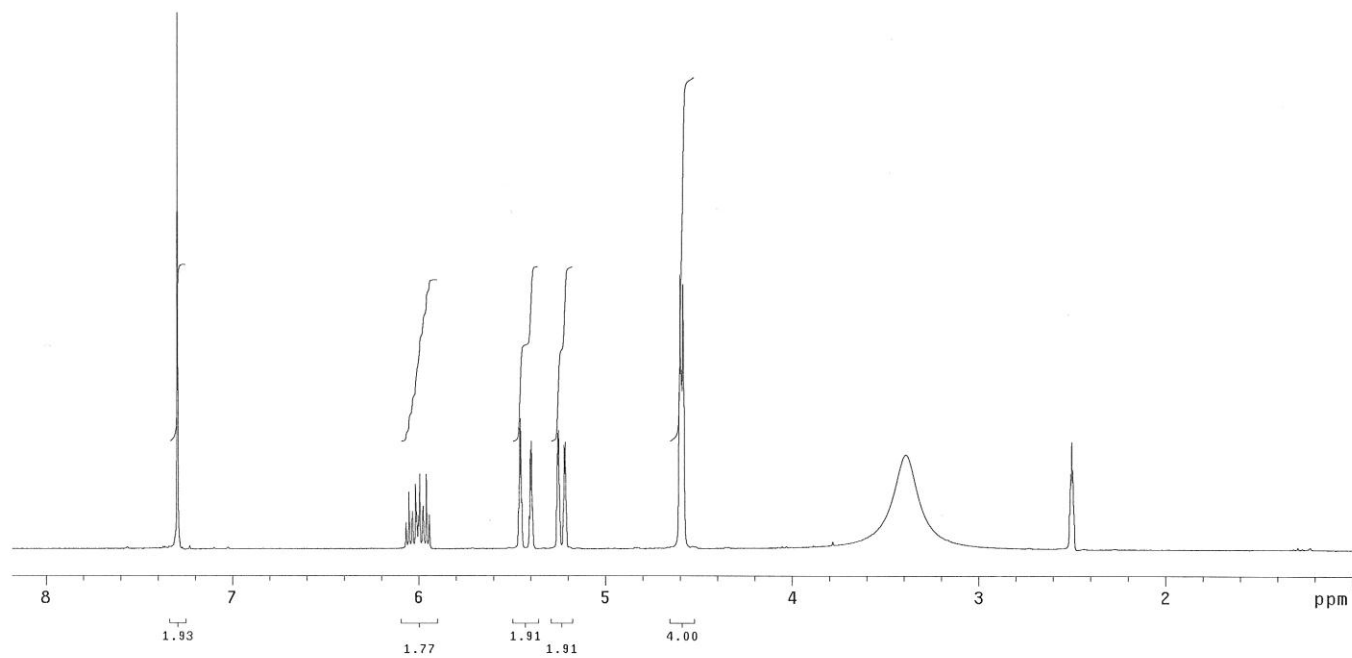

Figure S 1  $^1\text{H}$  NMR spectrum of  $\text{H}_2\text{L}^1$  in  $d_6$ -DMSO solution at 300 MHz.

cr110209\_diallyl-acid\_Carbon  
File: cr110209\_diallyl-acid\_Carbon  
Pulse Sequence: s2pu1  
Solvent: DMSO  
Temp. 25.0 C / 298.1 K  
Operator: chemist  
File: cr110209\_diallyl-acid\_Carbon  
VNMR5-500 "zeeman.domain.com"

Relax. delay 1.000 sec  
Pulse 45.0 degrees  
Acq. time 1.301 sec  
Width 18115.9 Hz  
504 repetitions  
OBSERVE C13, 75.4246828 MHz  
DECOUPLE H1, 299.9601952 MHz  
Power 35 dB  
continuously on  
WALTZ-16 modulated  
DATA PROCESSING  
Line broadening 0.5 Hz  
FT size 65536  
Total time 20 min, 0 sec

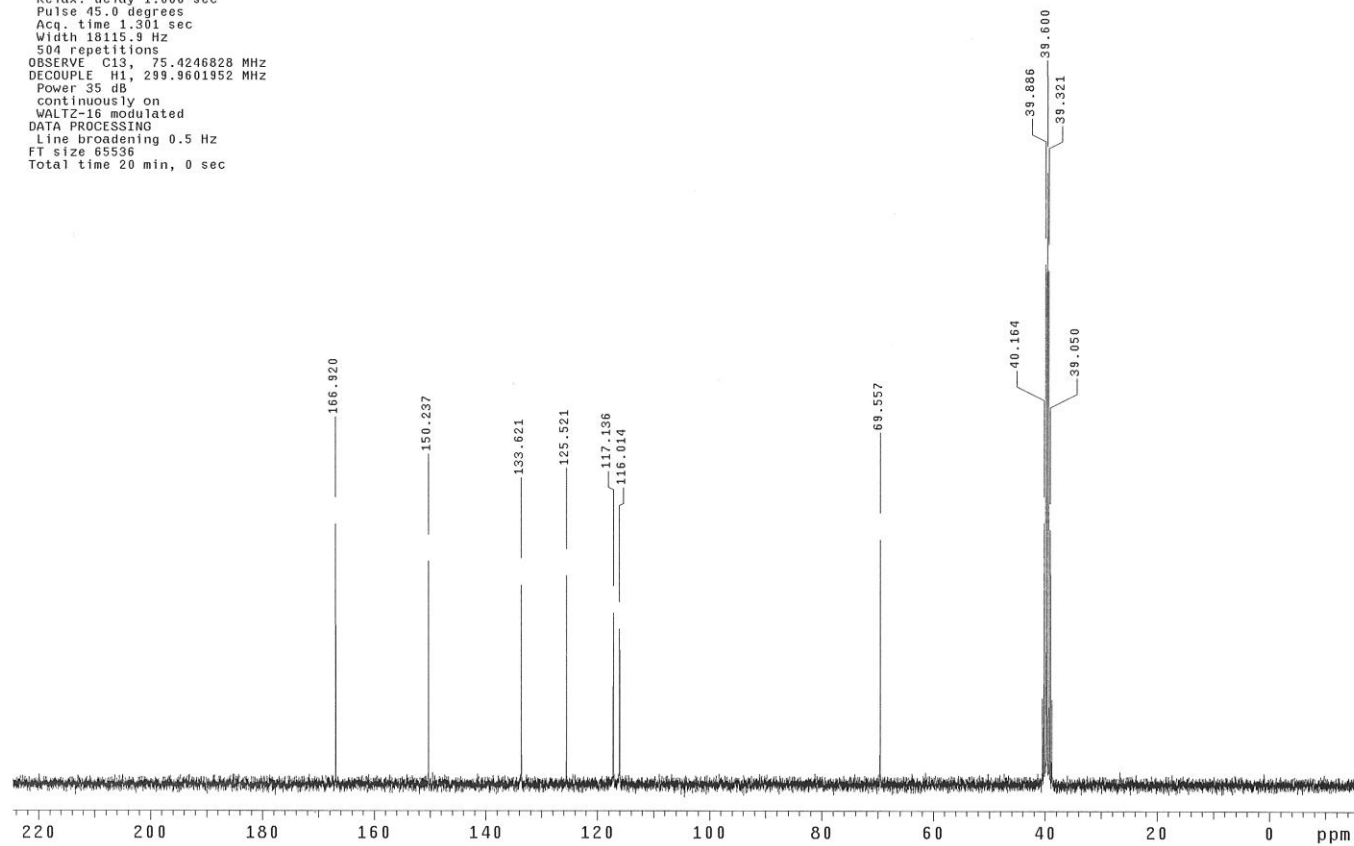

Figure S 2  $^{13}\text{C}$  NMR spectrum of  $\text{H}_2\text{L}^1$  in  $d_6$ -DMSO solution at 75.5 MHz.

## 2 Single Crystal X-ray Crystallography

**Table S1.** Crystal data and structure refinement for **1** and **2**.

|                                             | <b>1</b>                                        | <b>2</b>                                        |
|---------------------------------------------|-------------------------------------------------|-------------------------------------------------|
| Identification code                         |                                                 |                                                 |
| Empirical formula                           | C <sub>24</sub> O <sub>13</sub> Zn <sub>4</sub> | C <sub>24</sub> O <sub>13</sub> Zn <sub>4</sub> |
| Formula weight                              | 757.71                                          | 757.73                                          |
| Temperature/K                               | 120.0(1)                                        | 120.0(1)                                        |
| Crystal system                              | cubic                                           | cubic                                           |
| Space group                                 | Pm-3m                                           | Fm-3m                                           |
| a/Å                                         | 12.7953(10)                                     | 25.7643(3)                                      |
| b/Å                                         | 12.7953(10)                                     | 25.7643(3)                                      |
| c/Å                                         | 12.7953(10)                                     | 25.7643(3)                                      |
| α/°                                         | 90                                              | 90                                              |
| β/°                                         | 90                                              | 90                                              |
| γ/°                                         | 90                                              | 90                                              |
| Volume/Å <sup>3</sup>                       | 2094.8(5)                                       | 17102.3(7)                                      |
| Z                                           | 1                                               | 8                                               |
| ρ <sub>calc</sub> /mg/mm <sup>3</sup>       | 0.601                                           | 0.589                                           |
| m/mm <sup>-1</sup>                          | 1.493                                           | 1.129                                           |
| F(000)                                      | 368.0                                           | 2944.0                                          |
| Crystal size/mm <sup>3</sup>                | 0.16 × 0.14 × 0.10                              | 0.15 × 0.14 × 0.11                              |
| Radiation                                   | CuKα (λ = 1.54184)                              | MoKα (λ = 0.71073)                              |
| 2θ range for data collection                | 6.908 to 146.806°                               | 5.244 to 59.24°                                 |
| Index ranges                                | -15 ≤ h ≤ 14, -15 ≤ k ≤ 7, -8 ≤ l ≤ 10          | -26 ≤ h ≤ 35, -35 ≤ k ≤ 35, -32 ≤ l ≤ 32        |
| Reflections collected                       | 1977                                            | 21972                                           |
| Independent reflections                     | 476                                             | 1224                                            |
| Data/restraints/parameters                  | 476/0/23                                        | 1224/0/25                                       |
| Goodness-of-fit on F <sup>2</sup>           | 2.242                                           | 1.067                                           |
| Final R indexes [I ≥ 2σ (I)]                | 0.1982                                          | 0.0616                                          |
| Final R indexes [all data]                  | 0.5309                                          | 0.2249                                          |
| Largest diff. peak/hole / e Å <sup>-3</sup> | 1.19/-0.84                                      | 0.66/-0.26                                      |

## NOTES

The data for **1** was collected at low temperature using CuK $\alpha$  ( $\lambda = 1.54184$ ) radiation. The structure of **1** was solved and refined in the cubic space group  $Pm-3m$  ( $a = 12.7953(1)\text{\AA}$ ). This is the same space group and unit cell parameter as the MOF reported by Fischer et al. (CSD code AJOQEW) using a ligand that differs only in the identity of the pendant tag groups.<sup>2</sup> The data collected for **1** was of poor quality, and the structure is considerably disordered. The asymmetric unit consists of a Zn atom coordinated to an oxo-atom of the SBU with a bond length of  $1.919(5)\text{\AA}$  and a carboxylate atom of the bridging ligand at a distance of  $1.884(17)\text{\AA}$ , and is completed by 3 carbons belonging to the phenyl ring of the ligand. The asymmetric unit described is disordered over two sites, each with 50% occupancy (Figure S3). Pendant tag groups on the phenyl ring and solvate molecules were not able to be located and the SQUEEZE algorithm as implemented in the Platon program suite was used. This showed a solvent accessible void space of  $1497\text{\AA}^3$  with an electron count of 381 electrons. The atoms of the bridging ligand  $L^1$  not accounted for in the formula per ligand of  $L^1$  is  $C_6H_{10}O_2$ , which represents 62 electrons. This gives a total of 186 electrons for the number of  $L^1$  ligands per unit cell (3), leaving 195 electrons per unit cell free for disordered solvate, which would account for  $\approx 5$  molecules of DMF.

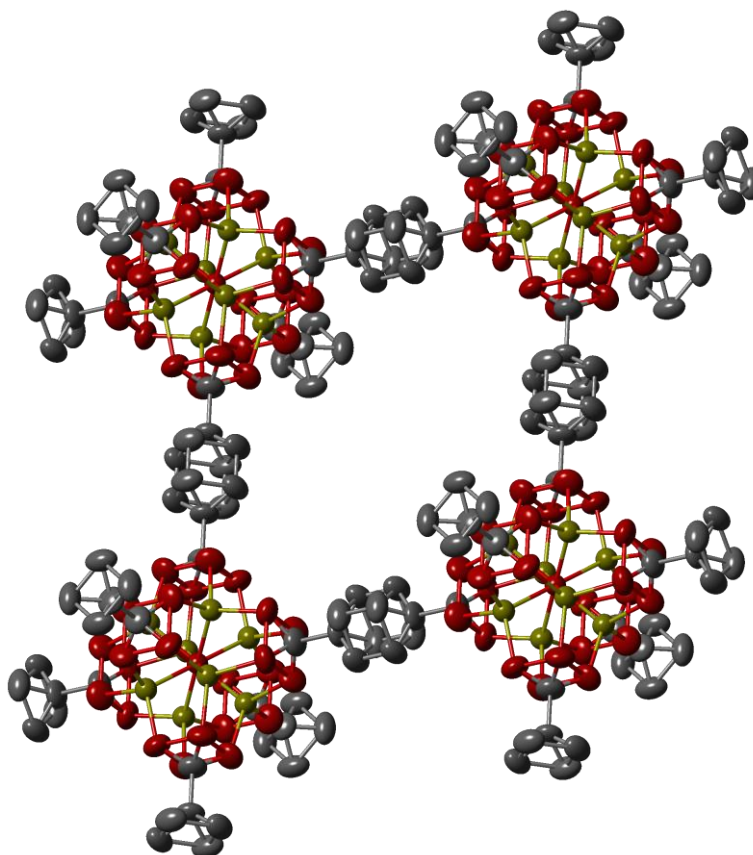

**Figure S 3** Partial structure of **1** showing the disorder of the phenyl ring and Zn<sub>4</sub>O SBU.

The data of **2** was collected at low temperature using MoK $\alpha$  ( $\lambda = 0.71073$ ) radiation. The structure of **2** solved and refined in the F-centered cubic space group  $Fm-3m$  ( $a = 25.7643(3)\text{\AA}$ ). The data for **2** is of higher quality than **1** and examination of the systematic absences confirmed this space group assignment. The asymmetric unit comprises one-quarter of a bridging ligand of  $L^2$  lying on three mirror planes and  $1/24^{\text{th}}$  of a  $Zn_4O$  subunit; the central  $\mu_4$ -oxo atom (O1) of the SBU is located on a special position ( $1/4, 3/4, 1/4$ ). The independent zinc atom has Zn-O bond lengths of  $1.9366(9)\text{\AA}$  to the central  $\mu_4$ -oxo atom and  $1.922(4)\text{\AA}$  to the carboxylate. The asymmetric unit is completed by the carbon belonging to the carboxylate (C1) and by two carbons from the phenyl ring (C2 and C3). The thermal ellipsoids of C2 and C3 are elongated perpendicular to the plane of the ring, indicating some small tilting, as shown in Figure S4. This contributes to 'smearing out' the electron density of the attached tag groups. To account for the electron density of these groups and to attempt to reconcile the electron density of solvate molecules in the pores, the data was treated with the SQUEEZE algorithm as implemented in the Platon program suite (as above). Prior to treatment with SQUEEZE, the  $R_1$  was  $\approx 11\%$  and the highest peak in the difference map was  $1.2$  electrons/ $\text{\AA}^3$  and afterward the  $R_1$  lowered to  $6.16\%$  and the highest peak reduced to  $0.7$  electrons/ $\text{\AA}^3$ . The solvent accessible space is calculated to have a volume of  $13280 \text{\AA}^3$ , which contains  $1925$  electrons. The formula of the missing atoms per molecule of  $L^2$  is  $C_6H_{10}O_2$ , which accounts for  $62$  electrons. This gives a total of  $1488$  electrons for the number of molecules of  $L^2$  per unit cell ( $24$ ), leaving approximately  $440$  electrons per unit cell free for disordered solvate, likely taken up by  $\approx 11$  molecules of DMF.

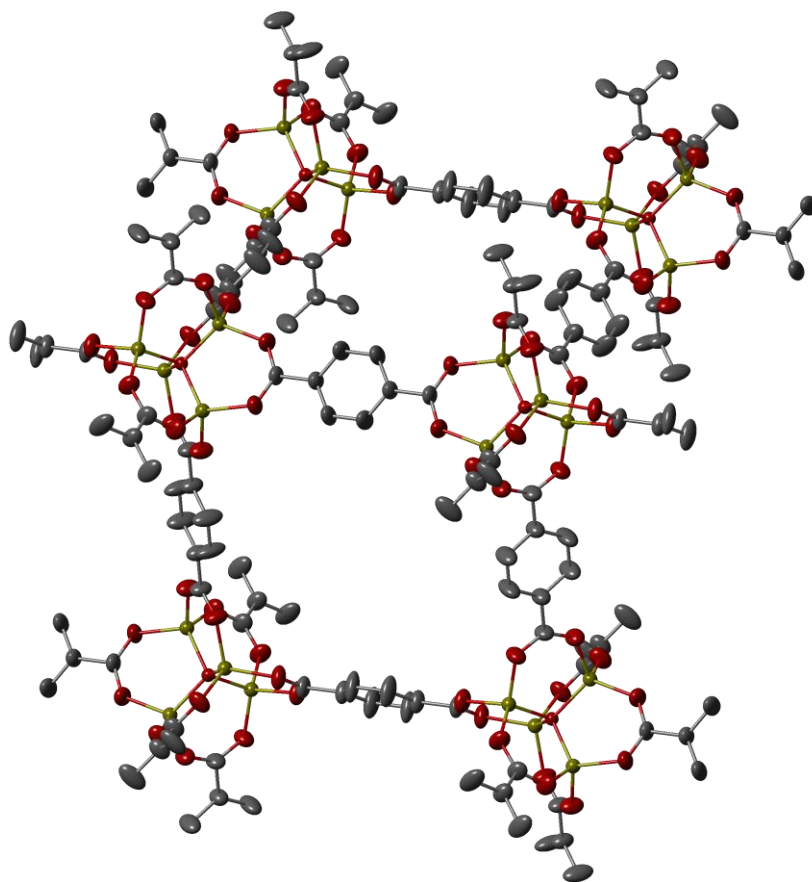

**Figure S 4** Partial structure expansion of **2** with thermal ellipsoids to show the small tilting of the phenyl rings.

### 3 TG–DTA data

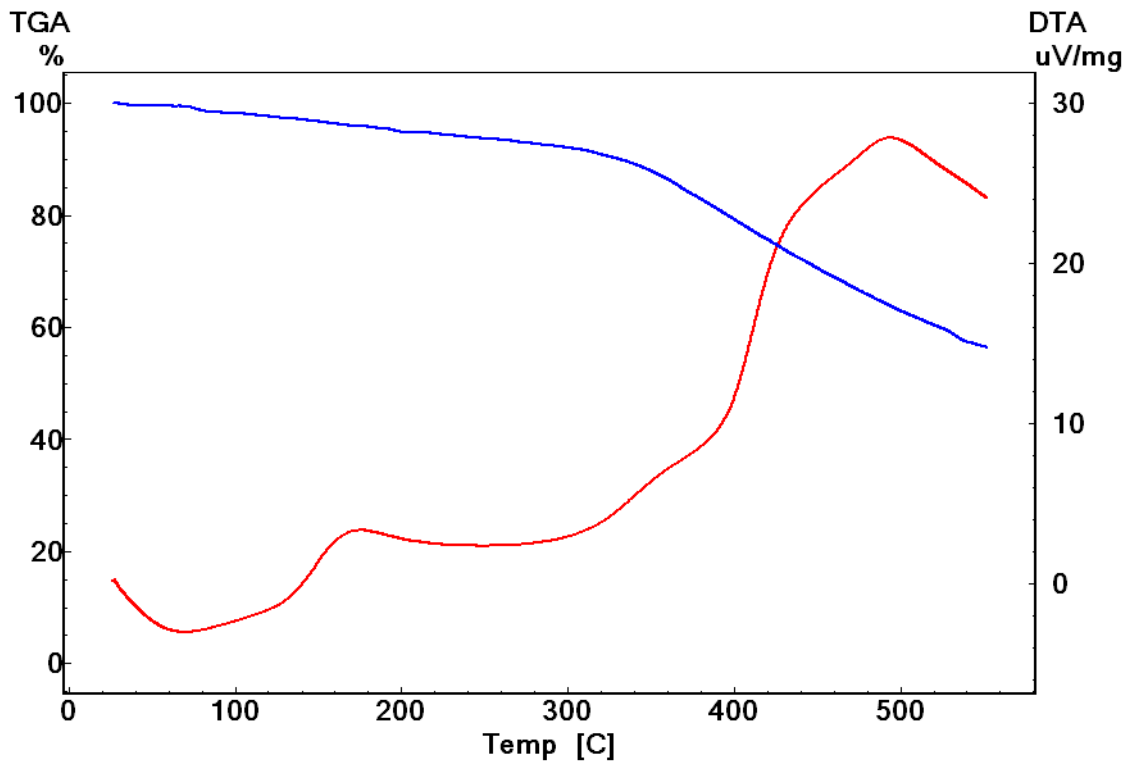

Figure S 5. TG–DTA traces for dried 1; the exotherm centred about 160 °C is evident. The blue curve represents the TGA; the red curve represents the DTA.

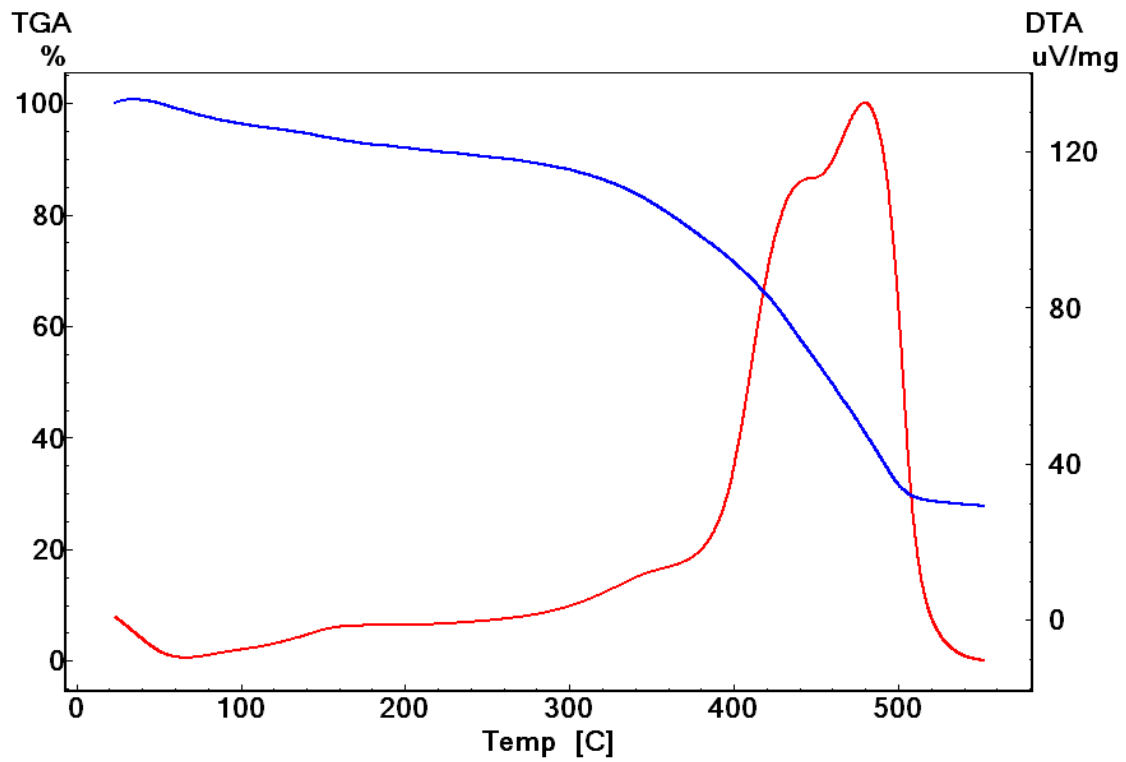

Figure S 6. TG–DTA traces for dried 2; there is no exotherm around 160 °C. The blue curve represents the TGA; the red curve represents the DTA.



#### 4 Images of modified crystals

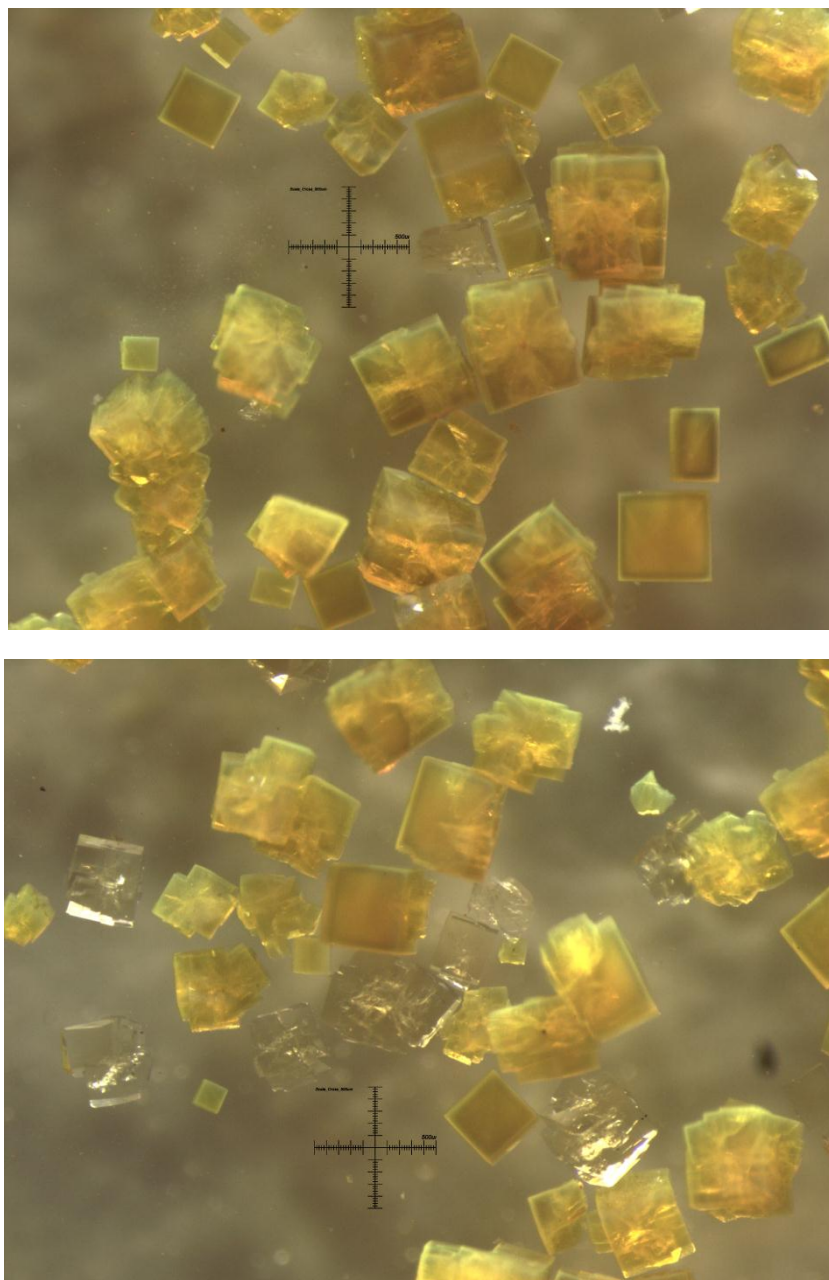

**Figure S 7** Image of modified crystals (top) and image of modified crystals **2** deliberately spiked with some near colourless starting crystals of **1** (bottom). The scale bar in each image is 500  $\mu\text{m}$ .

## 5 $^1\text{H}$ NMR Digestion Spectra

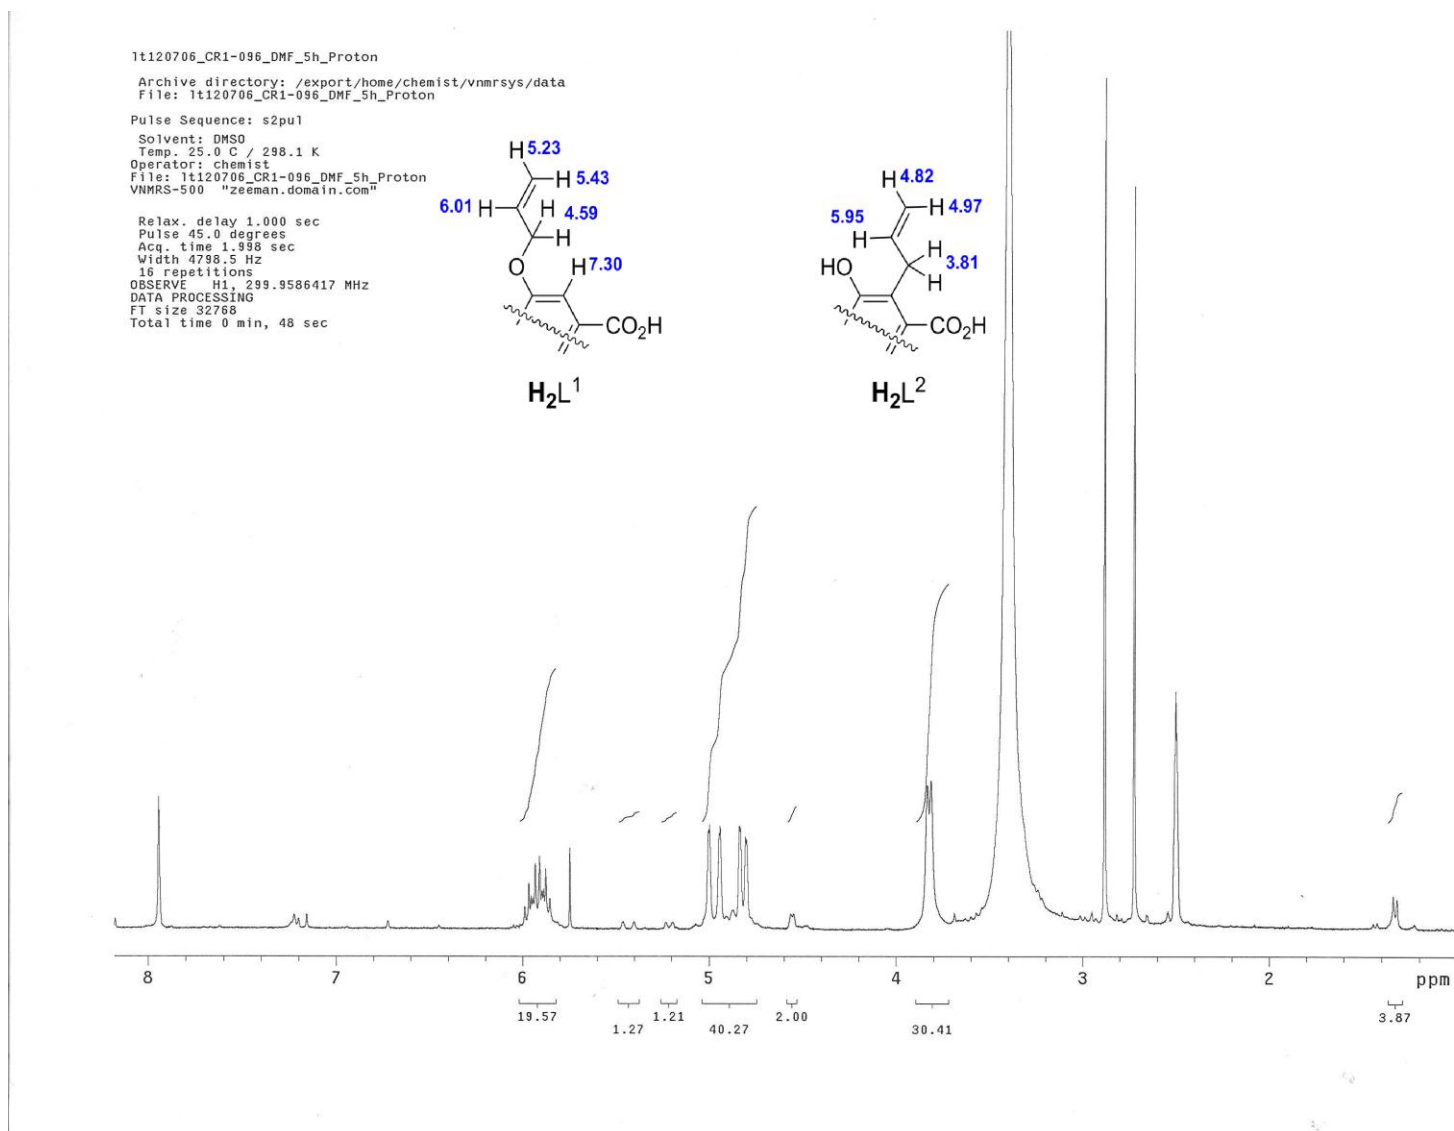

**Figure S 8**  $^1\text{H}$  NMR spectrum in  $d_6$ -DMSO solution of **2** from the PSR in DMF.

cr120713\_cr1-096\_DEF\_0.5h\_Proton  
Archive directory: /export/home/chemist/vnmrsys/data  
Sample directory:  
File: PROTON  
Pulse Sequence: s2pul  
Solvent: DMSO  
Temp. 25.0 C / 298.1 K  
Operator: chemist  
Mercury-300BB "bloch"  
Relax. delay 1.000 sec  
Pulse 45.0 degrees  
Acq. time 1.998 sec  
Width 4798.5 Hz  
16 repetitions  
OBSERVE H1, 299.9586417 MHz  
DATA PROCESSING  
FT size 32768  
Total time 0 min, 49 sec

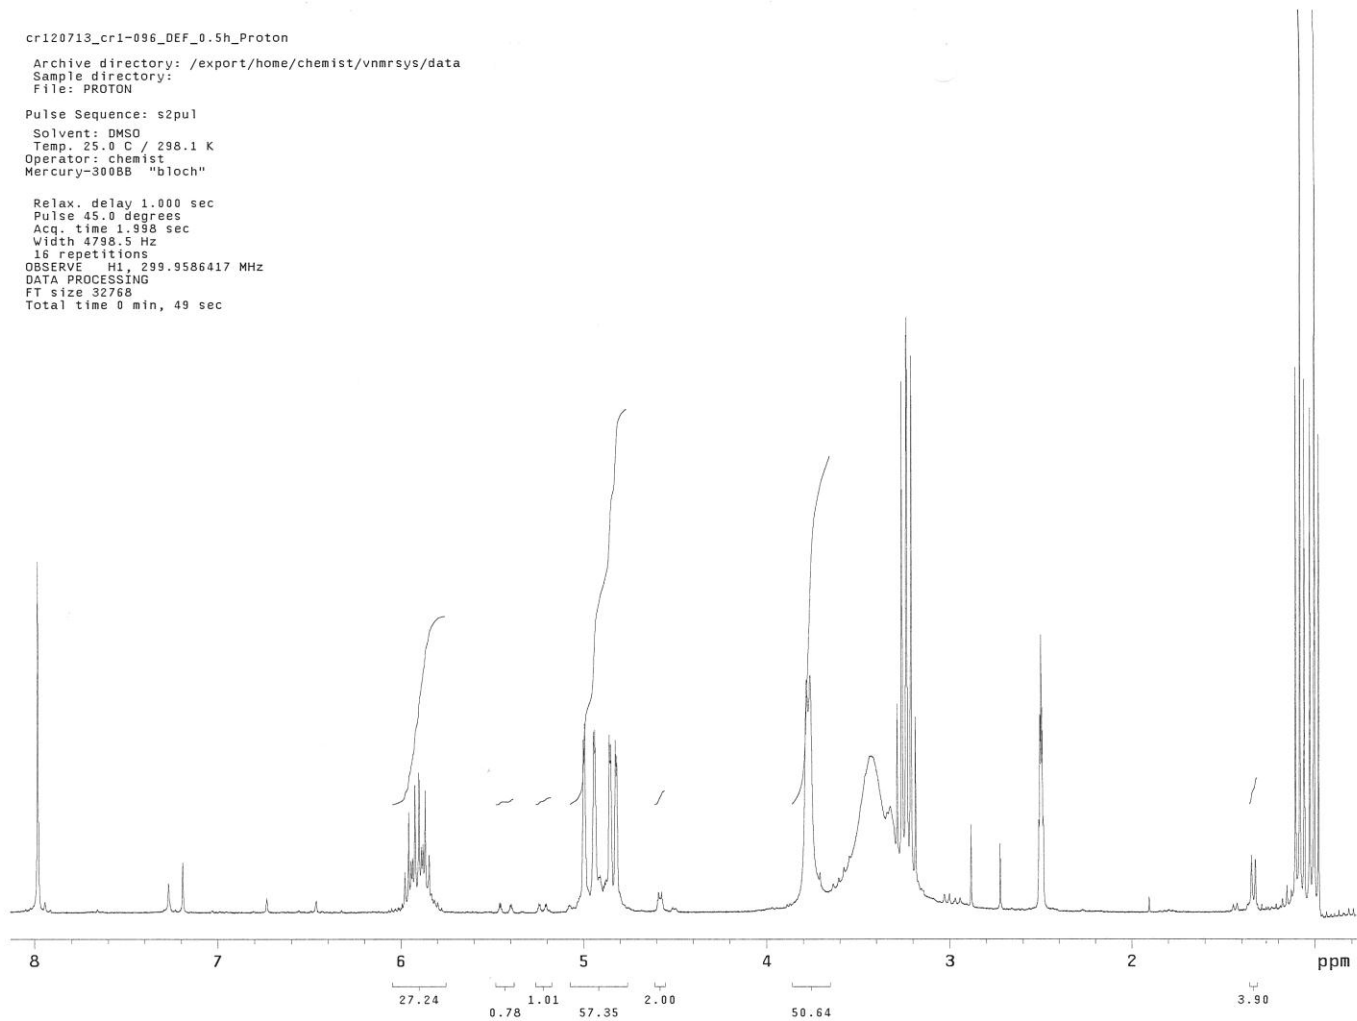

Figure S 9 <sup>1</sup>H NMR spectrum in *d*<sub>6</sub>-DMSO solution of **2** from the PSR in DEF.

## 6 Infrared Spectroscopy

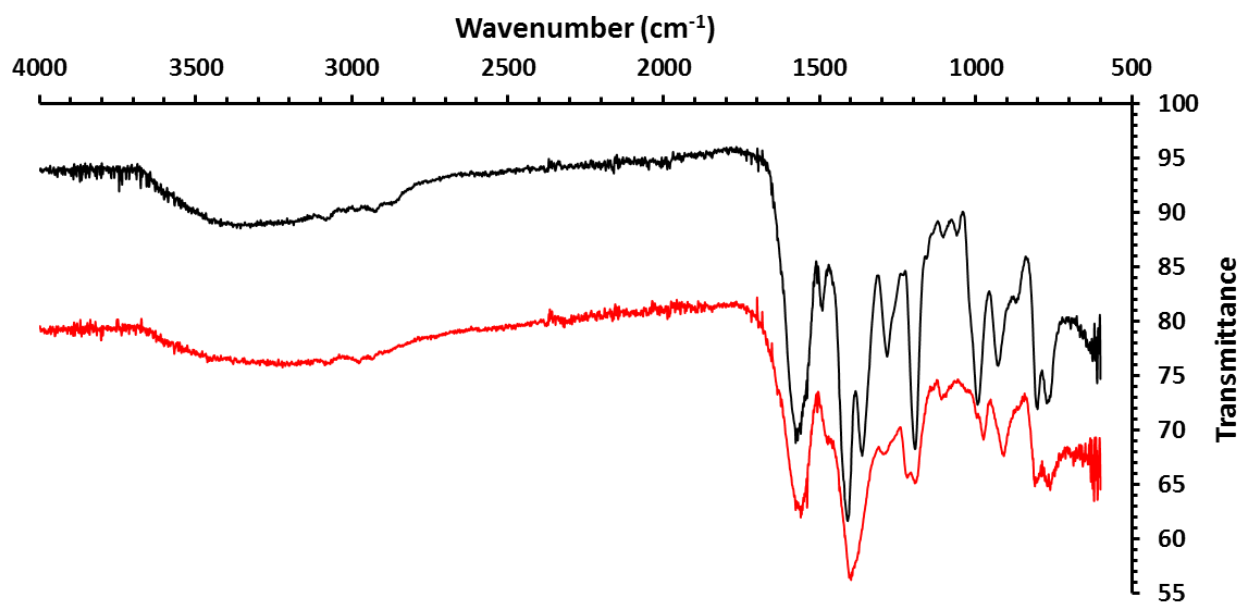

Figure S 10 Infrared spectra of  $\text{Zn}_4\text{O}(\text{L}^1)_3$  **1** (black) and  $\text{Zn}_4\text{O}(\text{L}^2)_3$  **2** (red)

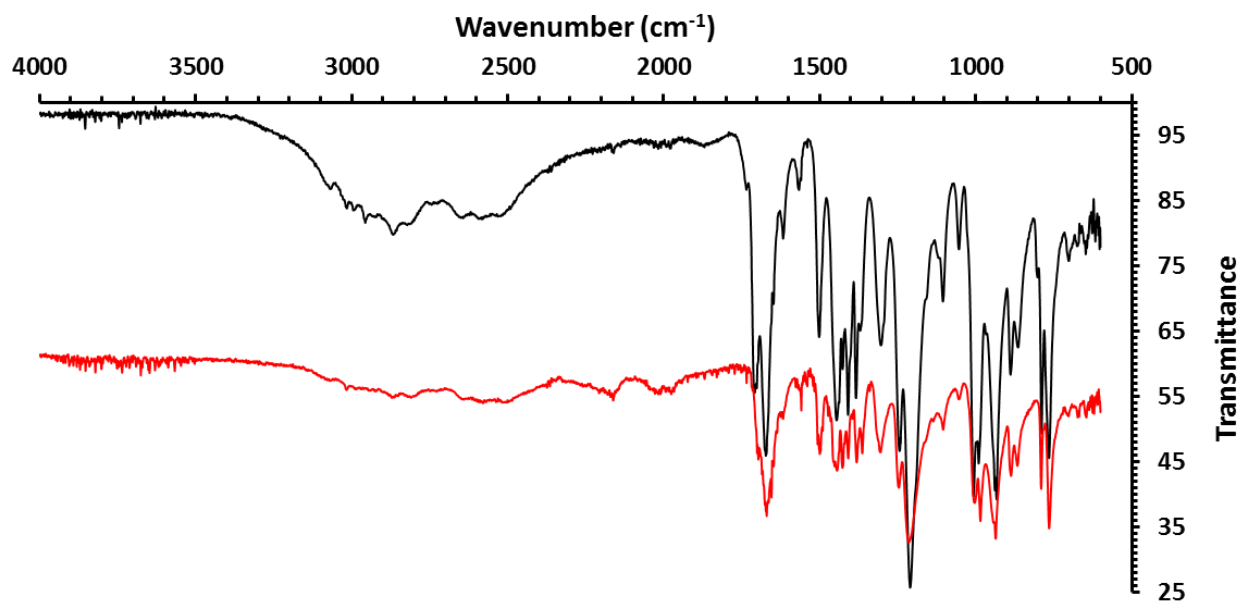

Figure S 11 Infrared spectra of  $\text{H}_2\text{L}^1$  (black) and  $\text{H}_2\text{L}^2$  (red)

## 7 Mass Spectrometry

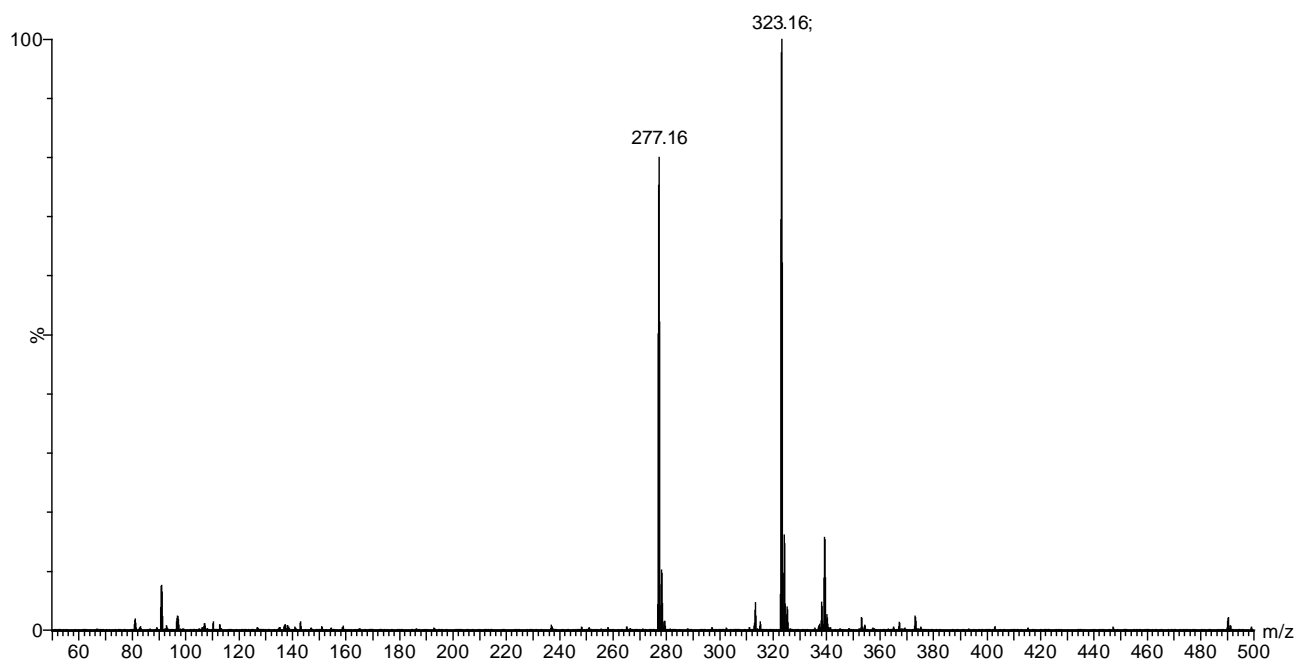

Figure S 12 Negative mode ESI mass spectrum of H<sub>2</sub>L<sup>1</sup>

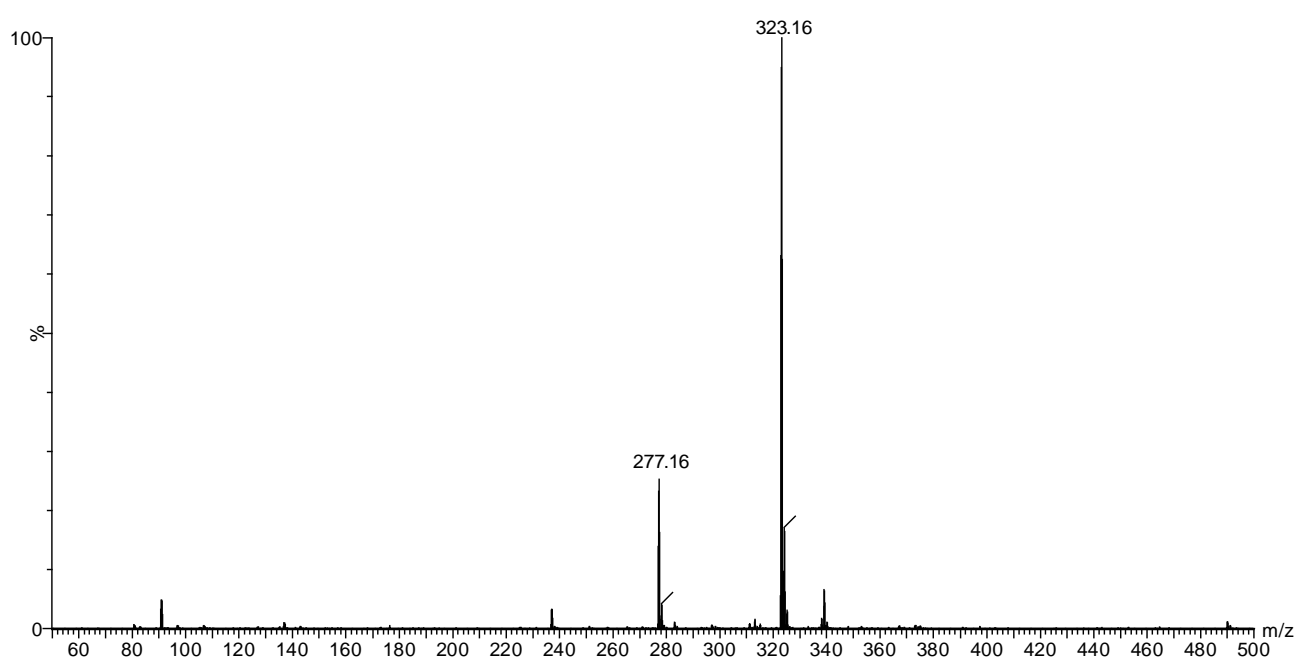

Figure S 13 Negative mode ESI mass spectrum of H<sub>2</sub>L<sup>2</sup>

## 8 PXRD

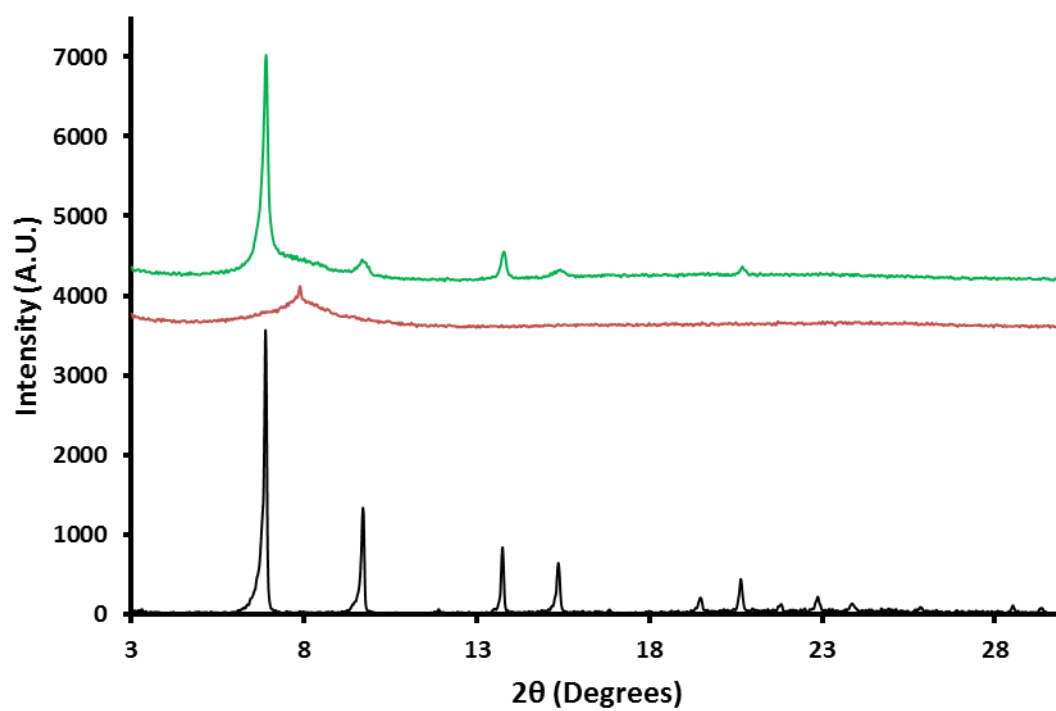

Figure S 14 PXRD patterns for 'as synthesised' 1 (black; bottom); activated 1 (red; centre); resolved 1 (top; green).

## 9 Gas Sorption Data

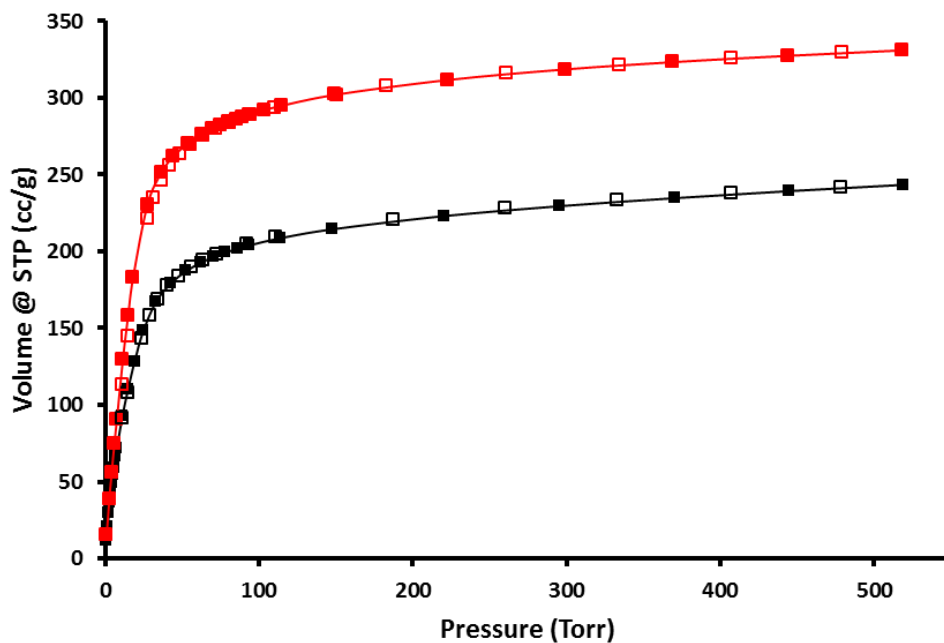

Figure S 15 CO<sub>2</sub> isotherms at 196 K for Zn<sub>4</sub>O(L<sup>1</sup>)<sub>3</sub> **1** (black) and Zn<sub>4</sub>O(L<sup>2</sup>)<sub>3</sub> **2** (red). Filled squares are adsorption, open squares are desorption.

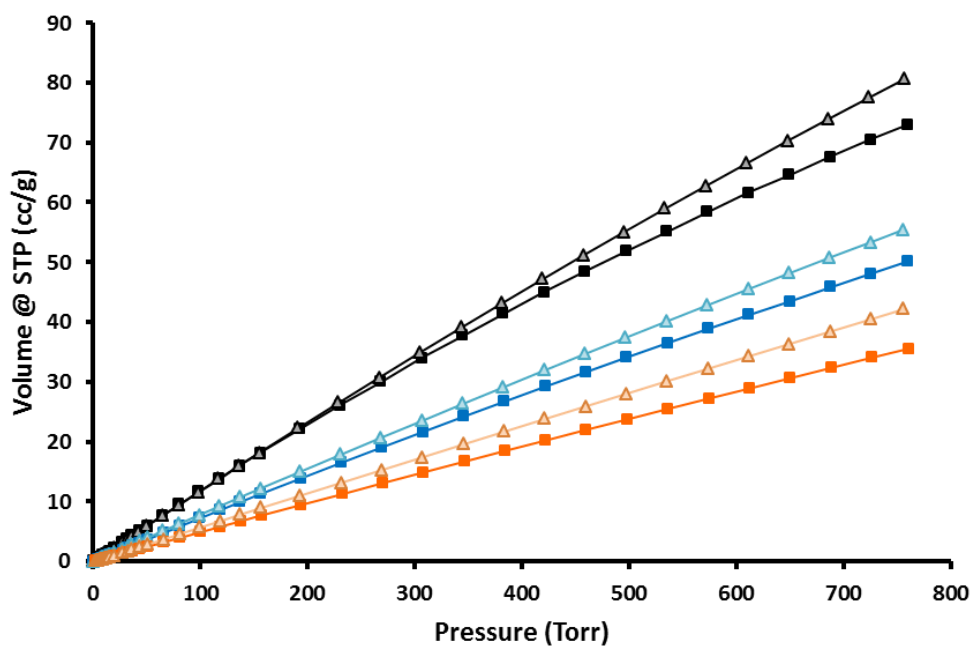

Figure S 16 CO<sub>2</sub> adsorption data for Zn<sub>4</sub>O(L<sup>1</sup>)<sub>3</sub> **1** (solid squares) and Zn<sub>4</sub>O(L<sup>2</sup>)<sub>3</sub> **2** (shaded triangles). Black, 273 K; blue, 288 K; orange, 298 K.

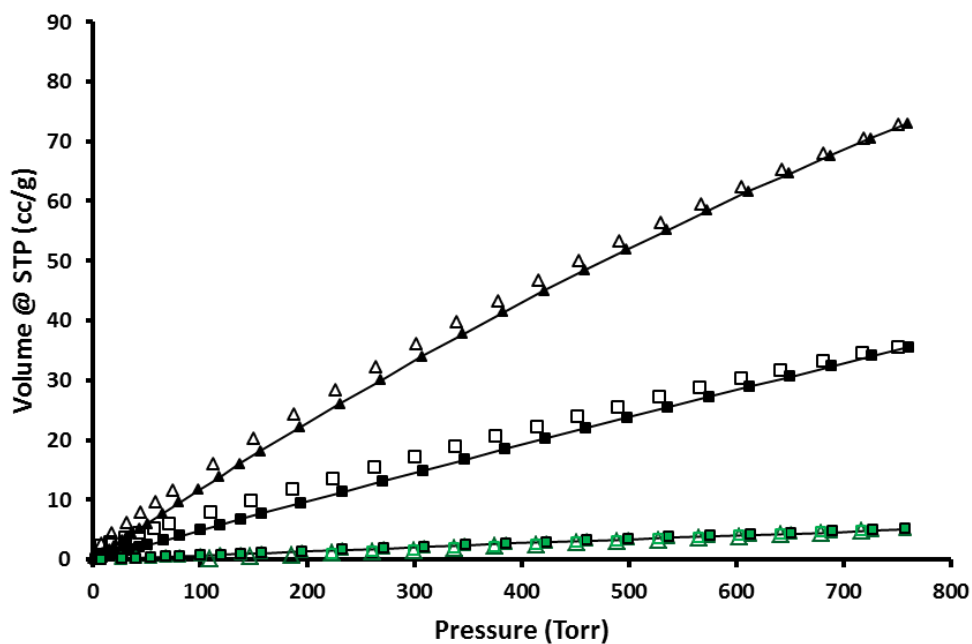

**Figure S 17** CO<sub>2</sub> and N<sub>2</sub> sorption data for Zn<sub>4</sub>O(L<sup>1</sup>)<sub>3</sub> **1**. Black triangles are CO<sub>2</sub> at 273 K; light green triangles are N<sub>2</sub> at 273 K; black squares are CO<sub>2</sub> at 298 K; green squares are N<sub>2</sub> at 298 K. Filled squares/triangles are adsorption, open squares/triangles are desorption.

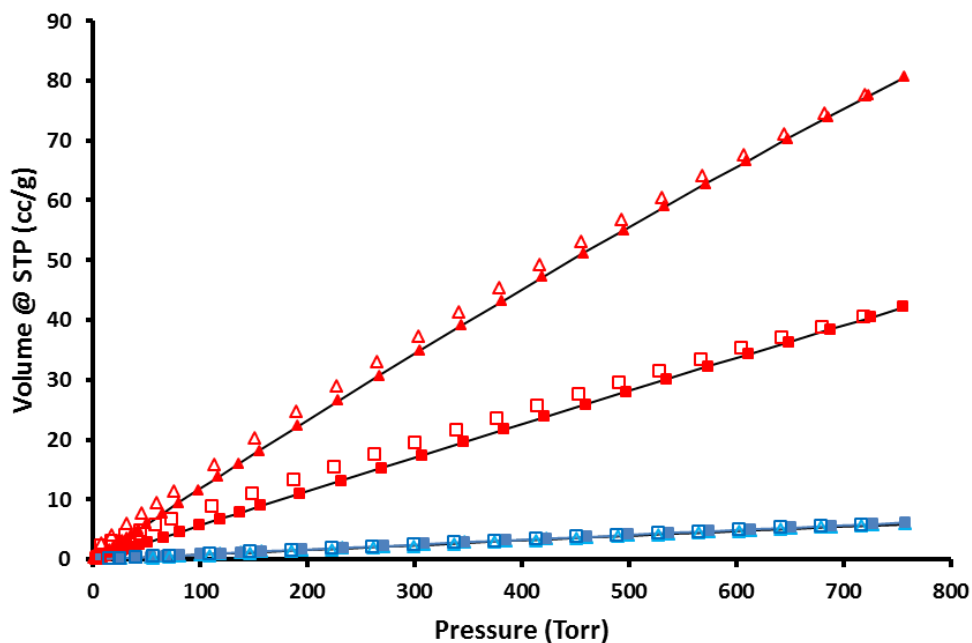

**Figure S 18** CO<sub>2</sub> and N<sub>2</sub> sorption data for Zn<sub>4</sub>O(L<sup>2</sup>)<sub>3</sub> **2**. Red triangles are CO<sub>2</sub> at 273 K; light blue triangles are N<sub>2</sub> at 273 K; red squares are CO<sub>2</sub> at 298 K; blue squares are N<sub>2</sub> at 298 K. Filled squares/triangles are adsorption, open squares/triangles are desorption.



## 10 Heat of Adsorption Calculations

The heat of adsorption for CO<sub>2</sub> was determined by comparing carbon dioxide isotherms at 288 and 298 K. Isothermic heat of adsorption calculations ( $-Q_{st}$ ) for CO<sub>2</sub> at these temperatures were undertaken by virial fitting and the Clausius-Clapeyron equation:

$$(\ln P)_n = -\left(\frac{Q_{st}}{R}\right)\left(\frac{1}{T}\right) + C$$

where  $P$  is the pressure,  $n$  is the amount adsorbed,  $T$  is the temperature,  $R$  is the universal gas constant and  $C$  is a constant.

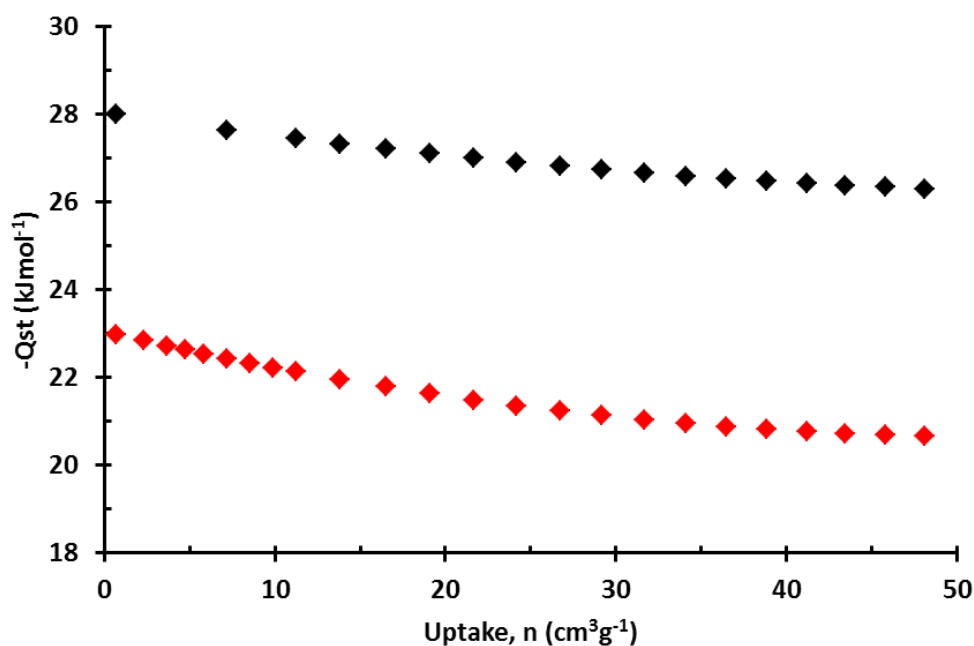

**Figure S 19** Isothermic heat of adsorption profiles (obtained by Virial fitting) of the adsorption data at 288 and 298 K for **1** (black) and **2** (red).

## 11 Surface Area Calculations

The geometric surface areas of MOF **2** was calculated following the method of Duren et. al.<sup>3</sup> with a probe diameter set to 3.72 Å to match nitrogen.<sup>4</sup> The diameters of framework atoms were taken from the DREIDING force field and set to their van der Waals diameters by multiplying their Lennard-Jones well-depth diameters,  $\sigma$ , by  $2^{1/6}$ .

---

<sup>1</sup> S. Henke, A. Schneemann, A. Wüschel and R. A. Fischer, *J. Am. Chem. Soc.*, 2012, **134**, 9464.

<sup>2</sup> S. Henke, R. Schmid, J.-D. Grunwaldt and R. A. Fisher, *Chem. Eur. J.*, 2010, **16**, 14296.

<sup>3</sup> (a) H. Frost, T. Düren and R.Q. Snurr, *J. Phys. Chem. B*, 2006, **110**, 9565; (b) T. Düren, F. Millange, G. Férey, K. S. Walton and R. Q. Snurr, *J. Phys. Chem. C* 2007, **111**, 15350.

<sup>4</sup> Y.-S. Bae, A. O. Yazaydin, R. Q. Snurr, *Langmuir* 2010, **26**, 5475.
